# Supplementary material for: Do Lifestyle Interventions in Pregnant Women with Overweight or Obesity Have an Effect on Neonatal Adiposity? A Systematic Review with Meta-Analysis
Source: MDPI journal article supplement (doi:10.3390/nu13061903), 2021-06-01
Supplement: s1 [file s1]

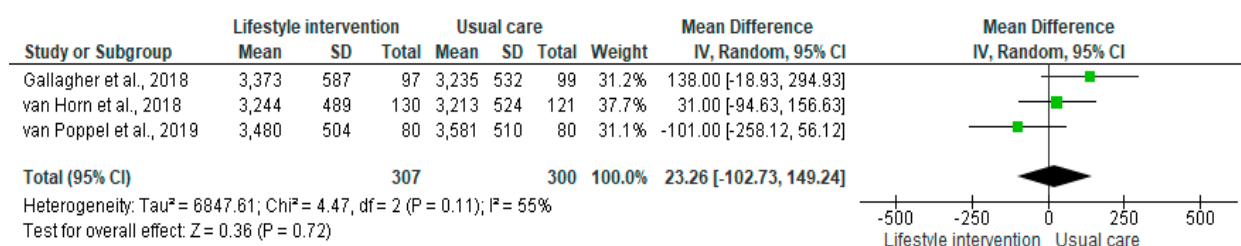

**Supplementary Figure S2.** Effect of the lifestyle interventions in pregnant women with excessive body weight on birth weight. SD = standard deviation; CI = confidence interval;  $\tau^2$  = Tau-squared test;  $\chi^2$  = Chi-squared test; Df = difference;  $P$  =  $p$  value;  $I^2$  = heterogeneity;  $Z$  =  $Z$  test. [1–3].

1. Gallagher, D.; Rosenn, B.; Toro-Ramos, T.; Paley, C.; Gidwani, S.; Horowitz, M.; Crane, J.; Lin, S.; Thornton, J.C.; Pi-Sunyer, X. Greater Neonatal Fat-Free Mass and Similar Fat Mass Following a Randomized Trial to Control Excess Gestational Weight Gain. *Obesity* **2018**, *26*, 578-587.
2. van Horn, L.; Peaceman, A.; Kwasny, M.; Vincent, E.; Fought, A.; Josefson, J.; Spring, B.; Neff, L.M.; Gernhofer, N. Dietary Approaches to Stop Hypertension Diet and Activity to Limit Gestational Weight: Maternal Offspring Metabolics Family In-tervention Trial, a Technology Enhanced Randomised Trial. *Am. J. Prev. Med.* **2018**, *55*, 603-614.
3. van Poppel, M.N.M.; Simmons, D.; Devlieger, R.; van Assche, F.A.; Jans, G.; Galjaard, S.; Corcoy, R.; Adelantado, J.M.; Dunne, F.; Harreiter, J.; et al. A reduction in sedentary behaviour in obese women during pregnancy reduces neonatal adiposity: the DALI randomised controlled trial. *Diabetologia* **2019**, *62*, 915-925.
