# Supplementary material for: Do Lifestyle Interventions in Pregnant Women with Overweight or Obesity Have an Effect on Neonatal Adiposity? A Systematic Review with Meta-Analysis
Source: MDPI journal article supplement (doi:10.3390/nu13061903), 2021-06-01
Supplement: s1 [file s1]

**Supplementary Table S2. PRISMA Abstract Checklist.**

| Topic                   | No. | Item                                                                                                                                                                                                                                                                                                   | Reported? |
|-------------------------|-----|--------------------------------------------------------------------------------------------------------------------------------------------------------------------------------------------------------------------------------------------------------------------------------------------------------|-----------|
| TITLE                   |     |                                                                                                                                                                                                                                                                                                        |           |
| Title                   | 1   | Identify the report as a systematic review.                                                                                                                                                                                                                                                            | Yes       |
| BACKGROUND              |     |                                                                                                                                                                                                                                                                                                        |           |
| Objectives              | 2   | Provide an explicit statement of the main objective(s) or question(s) the review addresses.                                                                                                                                                                                                            | Yes       |
| METHODS                 |     |                                                                                                                                                                                                                                                                                                        |           |
| Eligibility criteria    | 3   | Specify the inclusion and exclusion criteria for the review.                                                                                                                                                                                                                                           | Yes       |
| Information sources     | 4   | Specify the information sources (e.g., databases, registers) used to identify studies and the date when each was last searched.                                                                                                                                                                        | Yes       |
| Risk of bias            | 5   | Specify the methods used to assess risk of bias in the included studies.                                                                                                                                                                                                                               | Yes       |
| Synthesis of results    | 6   | Specify the methods used to present and synthesize results.                                                                                                                                                                                                                                            | Yes       |
| RESULTS                 |     |                                                                                                                                                                                                                                                                                                        |           |
| Included studies        | 7   | Give the total number of included studies and participants and summarise relevant characteristics of studies.                                                                                                                                                                                          | Yes       |
| Synthesis of results    | 8   | Present results for main outcomes, preferably indicating the number of included studies and participants for each. If meta-analysis was done, report the summary estimate and confidence/credible interval. If comparing groups, indicate the direction of the effect (i.e., which group is favoured). | Yes       |
| DISCUSSION              |     |                                                                                                                                                                                                                                                                                                        |           |
| Limitations of evidence | 9   | Provide a brief summary of the limitations of the evidence included in the review (e.g. study risk of bias, inconsistency and imprecision).                                                                                                                                                            | Yes       |
| Interpretation          | 10  | Provide a general interpretation of the results and important implications.                                                                                                                                                                                                                            | Yes       |
| OTHER                   |     |                                                                                                                                                                                                                                                                                                        |           |
| Funding                 | 11  | Specify the primary source of funding for the review.                                                                                                                                                                                                                                                  | Yes       |
| Registration            | 12  | Provide the register name and registration number.                                                                                                                                                                                                                                                     | Yes       |

Page, M.J.; McKenzie, J.E.; Bossuyt, P.M.; Boutron, I.; Hoffmann, T.C.; Mulrow, C.D., et al. The PRISMA 2020 statement: an updated guideline for reporting systematic reviews. *MetaArXiv* 2020. DOI: 10.31222/osf.io/v7gm2. For more information, visit: [www.prisma-statement.org](http://www.prisma-statement.org)
