# Supplementary material for: Do Lifestyle Interventions in Pregnant Women with Overweight or Obesity Have an Effect on Neonatal Adiposity? A Systematic Review with Meta-Analysis
Source: MDPI journal article supplement (doi:10.3390/nu13061903), 2021-06-01
Supplement: s1 [file s1]

| Certainty Assessment                |              |               |              |             |                  |                               | Summary of Findings   |                             |                          |                              |                                             |
|-------------------------------------|--------------|---------------|--------------|-------------|------------------|-------------------------------|-----------------------|-----------------------------|--------------------------|------------------------------|---------------------------------------------|
| Participants (studies)<br>Follow up | Risk of bias | Inconsistency | Indirectness | Imprecision | Publication bias | Overall certainty of evidence | Study event rates (%) |                             | Relative effect (95% CI) | Anticipated absolute effects |                                             |
|                                     |              |               |              |             |                  |                               | With Usual care       | With Lifestyle intervention |                          | Risk with Usual care         | Risk difference with Lifestyle intervention |

**The effect of the lifestyle intervention with overweight/obese pregnant women in relation to neonatal adiposity**

|                  |                     |             |             |             |      |             |     |     |   |                                                                                                                |                                                  |
|------------------|---------------------|-------------|-------------|-------------|------|-------------|-----|-----|---|----------------------------------------------------------------------------------------------------------------|--------------------------------------------------|
| 1494<br>(4 RCTs) | very serious<br>a,b | not serious | not serious | not serious | none | ⊕⊕○○<br>LOW | 737 | 757 | - | The mean the effect of lifestyle intervention with overweight/obese pregnant women on neonatal adiposity was 0 | MD 1 <b>higher</b><br>(0.92 lower to 0.5 higher) |
|------------------|---------------------|-------------|-------------|-------------|------|-------------|-----|-----|---|----------------------------------------------------------------------------------------------------------------|--------------------------------------------------|

**Birth weight**

|                 |                |             |             |             |      |                  |     |     |   |                             |                                                       |
|-----------------|----------------|-------------|-------------|-------------|------|------------------|-----|-----|---|-----------------------------|-------------------------------------------------------|
| 607<br>(3 RCTs) | serious<br>a,b | not serious | not serious | not serious | none | ⊕⊕⊕○<br>MODERATE | 300 | 307 | - | The mean birth weight was 0 | MD 1 <b>higher</b><br>(102.73 lower to 149.24 higher) |
|-----------------|----------------|-------------|-------------|-------------|------|------------------|-----|-----|---|-----------------------------|-------------------------------------------------------|

**Gestational weight gain**

|                 |                |             |             |             |      |                  |     |     |   |                                        |                                                 |
|-----------------|----------------|-------------|-------------|-------------|------|------------------|-----|-----|---|----------------------------------------|-------------------------------------------------|
| 651<br>(3 RCTs) | serious<br>a,b | not serious | not serious | not serious | none | ⊕⊕⊕○<br>MODERATE | 326 | 325 | - | The mean gestational weight gain was 0 | MD 1 <b>higher</b><br>(1.24 lower to 2.7 lower) |
|-----------------|----------------|-------------|-------------|-------------|------|------------------|-----|-----|---|----------------------------------------|-------------------------------------------------|

**Body fat-free mass**

|                  |                |             |             |             |      |                  |     |     |   |                              |                                                     |
|------------------|----------------|-------------|-------------|-------------|------|------------------|-----|-----|---|------------------------------|-----------------------------------------------------|
| 1296<br>(3 RCTs) | serious<br>a,b | not serious | not serious | not serious | none | ⊕⊕⊕○<br>MODERATE | 645 | 651 | - | The mean fat-free mass was 0 | MD 1 <b>higher</b><br>(72.87 lower to 71.51 higher) |
|------------------|----------------|-------------|-------------|-------------|------|------------------|-----|-----|---|------------------------------|-----------------------------------------------------|

**Supplementary Figure S4.** Summary of findings: The effect of the lifestyle intervention with overweight/obese pregnant women in relation to the neonatal adiposity.
